# Supplementary material
Source: HighWire-hosted journal article supplement (https://bmjopen.bmj.com/content/14/4/e080612)

A

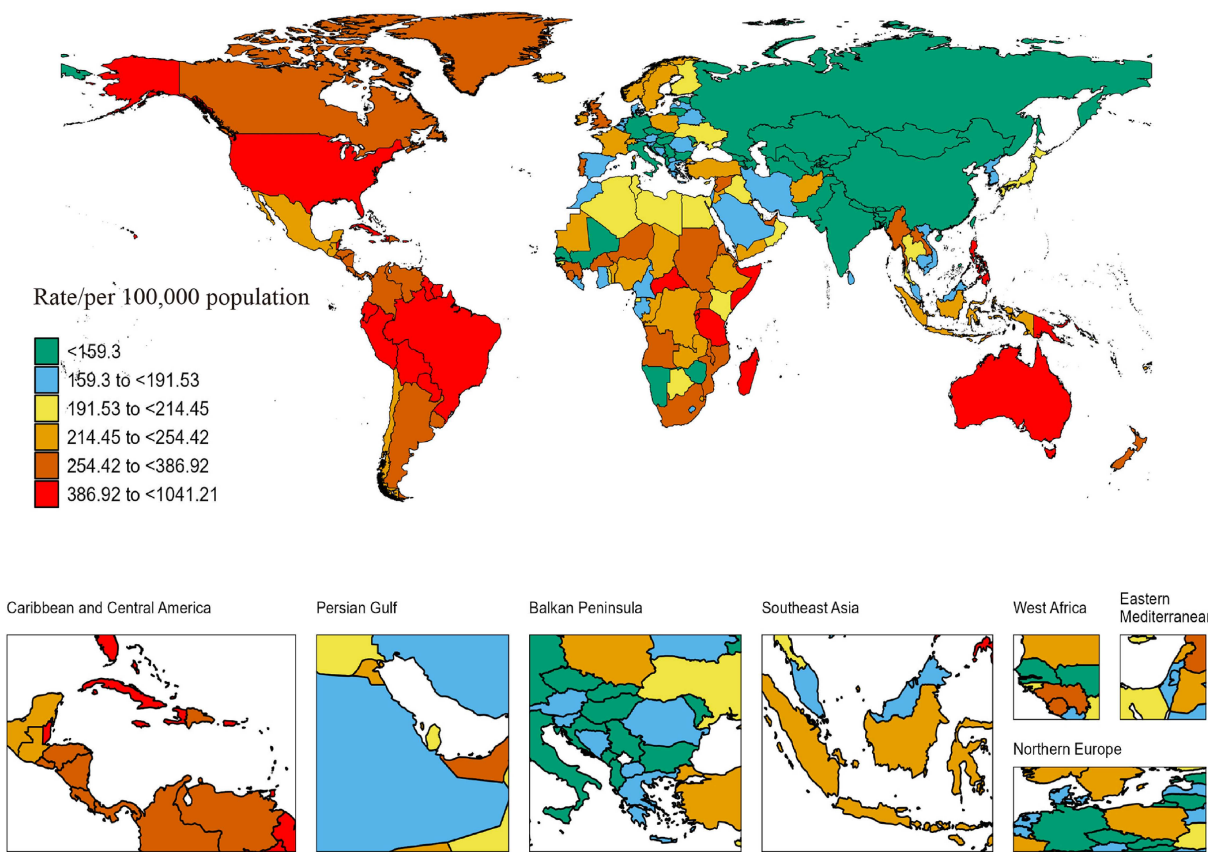

B

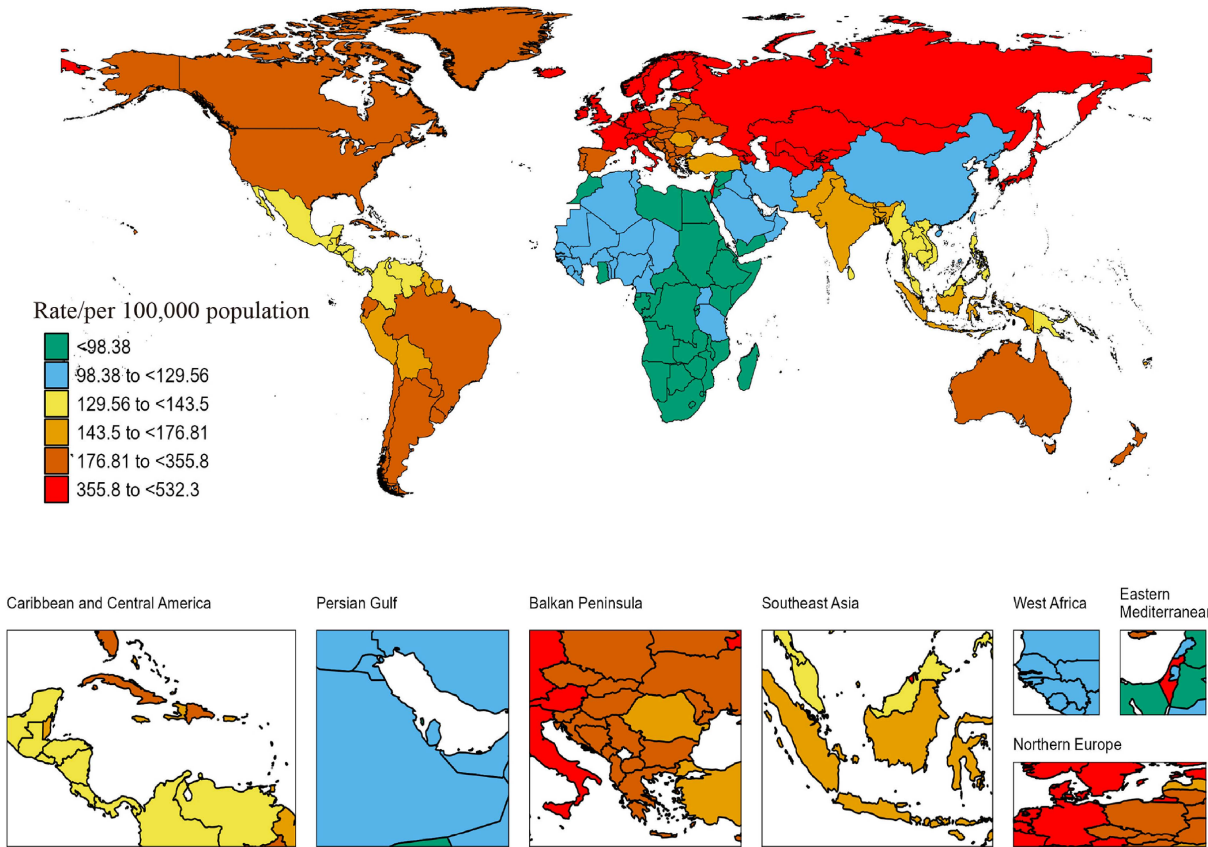

Supplement: inline-supplementary-material-8 [file inline-supplementary-material-8.pdf]
